# Supplementary material for: Impacts of the preceding cancer-specific health-related quality of life instruments on the responses to the subsequent EQ-5D-5L
Source: PubMed Central journal article supplement (PMC9843919; doi:10.1186/s12955-022-02085-8), 2023-01-17
Supplement: 12955_2022_2085_MOESM1_ESM.pdf [file 12955_2022_2085_MOESM1_ESM.pdf]

**Appendix for “Impacts of the Preceding Cancer-Specific Health-Related Quality of Life Measures on the Responses to the Subsequent EQ-5D-5L” in Health and Quality of Life Outcomes**

Shoki Izumi<sup>1\*</sup>, B.S., Yasuhiro Hagiwara<sup>2\*</sup>, Ph.D., M.P.H., Yutaka Matsuyama<sup>2</sup>, Ph.D., Takeru Shiroyama<sup>3</sup>, Ph.D., M.P.H., Naruto Taira<sup>4</sup>, M.D., Ph.D., Takuya Kawahara<sup>5</sup>, Ph.D., M.P.H., Keiko Konomura<sup>3</sup>, Ph.D., Shinichi Noto<sup>6</sup>, Ph.D., Takashi Fukuda<sup>3</sup>, Ph.D., Kojiro Shimozuma<sup>7</sup>, M.D., Ph.D.

<sup>1</sup> Biostatistics and Bioinformatics Course, Graduate School of Interdisciplinary Information Studies, The University of Tokyo, Tokyo, Japan

<sup>2</sup> Department of Biostatistics, School of Public Health, The University of Tokyo, Tokyo, Japan

<sup>3</sup> Center for Outcomes Research and Economic Evaluation for Health, National Institute of Public Health, Wako, Japan

<sup>4</sup> Department of Breast and Endocrine Surgery, Okayama University Hospital, Okayama, Japan

<sup>5</sup> Clinical Research Promotion Center, The University of Tokyo Hospital, Tokyo, Japan

<sup>6</sup> Center for Health Economics & QOL Research, Niigata University of Health and Welfare, Niigata, Japan

<sup>7</sup> Department of Biomedical Sciences, College of Life Sciences, Ritsumeikan University, Kusatsu, Japan

**Correspondence to:**

Yasuhiro Hagiwara, Ph.D.

Department of Biostatistics, School of Public Health, The University of Tokyo

[hagiwara@epistat.m.u-tokyo.ac.jp](mailto:hagiwara@epistat.m.u-tokyo.ac.jp)

## **Supplementary Methods**

### Analysis of EQ-5D-5L index

We assessed the mean EQ-5D-5L indexes of the subgroups using an analysis of variance with the order of the EQ-5D-5L, each covariate, and their interaction as explanatory variables. The p-values for the interaction terms were calculated using the type three sum of squares.

Using analysis of variance with the EQ-5D-5L's order, performance status, age, sex, tumor type, hospitalization, and adverse events at enrollment as the additional explanatory variable, the differences in the mean EQ-5D-5L indexes between the groups were estimated.

We conducted analysis of variance weighted by the inverse probability of observing the EQ-5D-5L index in order to adjust the impact of the missing one. The probability was estimated using linear logistic model with the order of the EQ-5D-5L, performance status, age, sex, tumor type, hospitalization, and adverse events at enrollment as explanatory variables. The 95% confidence intervals were constructed based on a conservative robust sandwich variance estimator.

The Spearman rank correlation coefficients between the EQ-5D-5L index and the subscales of EORTC QLQ-C30 and FACT-G were computed in the EQF and QEF and the EFQ and FEQ groups, respectively. The differences in the correlation coefficients among the groups were calculated; the p-values were determined using the Fisher z-transformation.

### Analysis of proportion of HRQOL with missing subscales

Using linear binomial regression (linear probability model) with the EQ-5D-5L's order, performance status, age, sex, hospitalization, and adverse events at enrollment as the additional explanatory variable, the differences in the proportions of those patients whose EQ-5D-5L were incomplete between the groups were estimated, although compared to multivariable analysis of EQ-5D-5L indexes, tumor type was not added to the model because it did not converge.

The differences in the proportions of the patients with any of the FACT-G subscales or its total score not calculated between the groups were estimated using linear binomial regression with the EQ-5D-5L's order as the explanatory variable.

The differences in the proportions of the patients with any of the EORTC QLQ-C30 subscales not calculated between the groups were estimated using linear binomial regression with the EQ-5D-5L's order as the explanatory variable.

## Supplementary Results

Table S1. Patient characteristics between the patients with complete and incomplete EQ-5D-5L.

| Characteristic                                | Completed EQ-5D-5LN =<br>937 | Incomplete EQ-5D-5LN =<br>92 |
|-----------------------------------------------|------------------------------|------------------------------|
| Age (in years)                                | 68 (58-74)                   | 65 (53-74)                   |
| Sex                                           |                              |                              |
| Male                                          | 509 (54%)                    | 44 (48%)                     |
| Female                                        | 428 (46%)                    | 48 (52%)                     |
| Tumor type                                    |                              |                              |
| Lung cancer                                   | 329 (35%)                    | 15 (16%)                     |
| Stomach cancer                                | 66 (7%)                      | 12 (13%)                     |
| Colorectal cancer                             | 232 (25%)                    | 28 (30%)                     |
| Breast cancer                                 | 116 (12%)                    | 19 (21%)                     |
| Other solid tumors                            | 194 (21%)                    | 18 (20%)                     |
| Stage at diagnosis                            |                              |                              |
| I                                             | 49 (5%)                      | 5 (5%)                       |
| II                                            | 74 (8%)                      | 4 (4%)                       |
| III                                           | 192 (20%)                    | 20 (22%)                     |
| IV                                            | 610 (65%)                    | 56 (61%)                     |
| Unknown                                       | 12 (1%)                      | 7 (8%)                       |
| Site of metastasis or recurrence <sup>a</sup> |                              |                              |
| None                                          | 83 (9%)                      | 12 (13%)                     |
| Liver                                         | 211 (23%)                    | 25 (27%)                     |
| Lung                                          | 296 (32%)                    | 29 (32%)                     |
| Bone                                          | 169 (18%)                    | 24 (26%)                     |
| Brain                                         | 100 (11%)                    | 2 (2%)                       |
| Lymph nodes                                   | 373 (40%)                    | 31 (34%)                     |
| Others                                        | 232 (25%)                    | 23 (25%)                     |
| History of surgery                            |                              |                              |
| Yes                                           | 497 (53%)                    | 59 (64%)                     |
| No                                            | 439 (47%)                    | 33 (36%)                     |
| Unknown                                       | 1 (0%)                       | 0 (0%)                       |
| Hospitalization                               |                              |                              |
| Yes                                           | 195 (21%)                    | 23 (25%)                     |

|                                |           |          |
|--------------------------------|-----------|----------|
| No                             | 742 (79%) | 69 (75%) |
| ECOG performance status        |           |          |
| 0                              | 464 (50%) | 47 (51%) |
| 1                              | 385 (41%) | 34 (37%) |
| 2                              | 67 (7%)   | 7 (8%)   |
| 3                              | 20 (2%)   | 3 (3%)   |
| Unknown (0, 1, 2, or 3)        | 1 (0%)    | 1 (1%)   |
| Type of treatment <sup>a</sup> |           |          |
| Chemotherapy                   | 606 (65%) | 62 (67%) |
| Endocrine therapy              | 67 (7%)   | 13 (14%) |
| Molecular targeted therapy     | 163 (17%) | 4 (4%)   |
| Immunotherapy                  | 112 (12%) | 9 (10%)  |
| Palliative therapy             | 37 (4%)   | 5 (5%)   |
| Others                         | 8 (1%)    | 2 (2%)   |
| Adverse event at enrollment    |           |          |
| Yes                            | 606 (65%) | 59 (64%) |
| No                             | 329 (35%) | 32 (35%) |
| Unknown                        | 2 (0%)    | 1 (1%)   |

---

The median (IQR) and the number (%) were reported for age and other characteristics, respectively.

<sup>a</sup>Multiple choices were allowed.

ECOG, Eastern Cooperative Oncology Group; IQR, interquartile range.

Table S2. Responses to the five items in the EQ-5D-5L in Group 1, FEQ and QEF.

|                           | Response level |           |          |         |        | vs Group 1 | vs FEQ |
|---------------------------|----------------|-----------|----------|---------|--------|------------|--------|
|                           | 1              | 2         | 3        | 4       | 5      |            |        |
| <b>Mobility</b>           |                |           |          |         |        |            |        |
| Group 1                   | 194 (65%)      | 51 (17%)  | 26 (9%)  | 23 (8%) | 6 (2%) | –          | –      |
| FEQ                       | 75 (50%)       | 45 (30%)  | 20 (13%) | 8 (5%)  | 3 (2%) | 0.015      | –      |
| QEF                       | 71 (46%)       | 43 (28%)  | 21 (14%) | 13 (8%) | 7 (5%) | <0.001     | 0.266  |
| <b>Self-care</b>          |                |           |          |         |        |            |        |
| Group 1                   | 243 (81%)      | 28 (9%)   | 16 (5%)  | 8 (3%)  | 5 (2%) | –          | –      |
| FEQ                       | 124 (82%)      | 17 (11%)  | 5 (3%)   | 4 (3%)  | 1 (1%) | 0.686      | –      |
| QEF                       | 118 (76%)      | 23 (15%)  | 7 (5%)   | 1 (1%)  | 6 (4%) | 0.274      | 0.192  |
| <b>Usual activities</b>   |                |           |          |         |        |            |        |
| Group 1                   | 150 (50%)      | 92 (31%)  | 31 (10%) | 22 (7%) | 5 (2%) | –          | –      |
| FEQ                       | 66 (44%)       | 55 (36%)  | 16 (11%) | 10 (7%) | 4 (3%) | 0.308      | –      |
| QEF                       | 56 (36%)       | 68 (44%)  | 16 (10%) | 6 (4%)  | 9 (6%) | 0.024      | 0.292  |
| <b>Pain/discomfort</b>    |                |           |          |         |        |            |        |
| Group 1                   | 122 (41%)      | 126 (42%) | 39 (13%) | 10 (3%) | 3 (1%) | –          | –      |
| FEQ                       | 55 (36%)       | 73 (48%)  | 16 (11%) | 5 (3%)  | 2 (1%) | 0.650      | –      |
| QEF                       | 63 (41%)       | 67 (43%)  | 15 (10%) | 7 (5%)  | 3 (2%) | 0.961      | 0.649  |
| <b>Anxiety/depression</b> |                |           |          |         |        |            |        |
| Group 1                   | 188 (63%)      | 85 (28%)  | 16 (5%)  | 7 (2%)  | 4 (1%) | –          | –      |
| FEQ                       | 81 (54%)       | 51 (34%)  | 15 (10%) | 3 (2%)  | 1 (1%) | 0.064      | –      |

|     |          |          |        |        |        |       |       |
|-----|----------|----------|--------|--------|--------|-------|-------|
| QEF | 88 (57%) | 49 (32%) | 9 (6%) | 7 (5%) | 2 (1%) | 0.196 | 0.639 |
|-----|----------|----------|--------|--------|--------|-------|-------|

Group 1 consisted of the two questionnaire types that had the EQ-5D-5L in the first position.

FEQ and QEF stand for the questionnaire types containing the HRQOL instruments in the order of FACT-G > EQ-5D-5L > EORTC QLQ-C30 and EORTC QLQ-C30 > EQ-5D-5L > FACT-G, respectively.

Table S3. Covariate-adjusted least square mean differences in the EQ-5D-5L indexes among the three groups.

|                    | Difference (95% CI; P-value)   |                              |
|--------------------|--------------------------------|------------------------------|
|                    | vs Group 1                     | vs Group 2                   |
| Japanese value set |                                |                              |
| Group 1            | –                              | –                            |
| Group 2            | –0.028 (–0.052, –0.003; 0.026) | –                            |
| Group 3            | –0.007 (–0.031, 0.018; 0.59)   | 0.021 (–0.003, 0.045; 0.083) |
| England value set  |                                |                              |
| Group 1            | –                              | –                            |
| Group 2            | –0.021 (–0.048, 0.007; 0.135)  | –                            |
| Group 3            | 0.001 (–0.026, 0.028; 0.929)   | 0.022 (–0.005, 0.049; 0.106) |
| US value set       |                                |                              |
| Group 1            | –                              | –                            |
| Group 2            | –0.028 (–0.062, 0.007; 0.112)  | –                            |
| Group 3            | –0.004 (–0.038, 0.030; 0.812)  | 0.024 (–0.010, 0.058; 0.166) |

Groups 1, 2, and 3 comprised the two questionnaire types having the EQ-5D-5L in the first, second, and last places, respectively. CI, confidence interval; US, the United States.



Table S4. Mean EQ-5D-5L indexes adjusted for the missing EQ-5D-5L index through an inverse probability weighting.

|                    | Mean (95% CI)        | Difference (95% CI; P-value)   |                              |
|--------------------|----------------------|--------------------------------|------------------------------|
|                    |                      | vs Group 1                     | vs Group 2                   |
| Japanese value set |                      |                                |                              |
| Group 1            | 0.796 (0.774, 0.818) | –                              | –                            |
| Group 2            | 0.760 (0.739, 0.781) | –0.036 (–0.067, –0.006; 0.021) | –                            |
| Group 3            | 0.788 (0.771, 0.806) | –0.007 (–0.036, 0.021; 0.606)  | 0.029 (0.001, 0.056; 0.043)  |
| England value set  |                      |                                |                              |
| Group 1            | 0.820 (0.796, 0.844) | –                              | –                            |
| Group 2            | 0.790 (0.766, 0.815) | –0.029 (–0.064, 0.005; 0.096)  | –                            |
| Group 3            | 0.821 (0.802, 0.841) | 0.001 (–0.030, 0.033; 0.926)   | 0.031 (0.000, 0.062; 0.054)  |
| US value set       |                      |                                |                              |
| Group 1            | 0.783 (0.752, 0.813) | –                              | –                            |
| Group 2            | 0.744 (0.713, 0.775) | –0.039 (–0.082, 0.005; 0.082)  | –                            |
| Group 3            | 0.778 (0.753, 0.803) | –0.004 (–0.044, 0.035; 0.829)  | 0.034 (–0.005, 0.074; 0.089) |

Groups 1, 2, and 3 comprised the two questionnaire types that had the EQ-5D-5L in the first, second, and last places, respectively. CI, confidence interval; US, the United States.

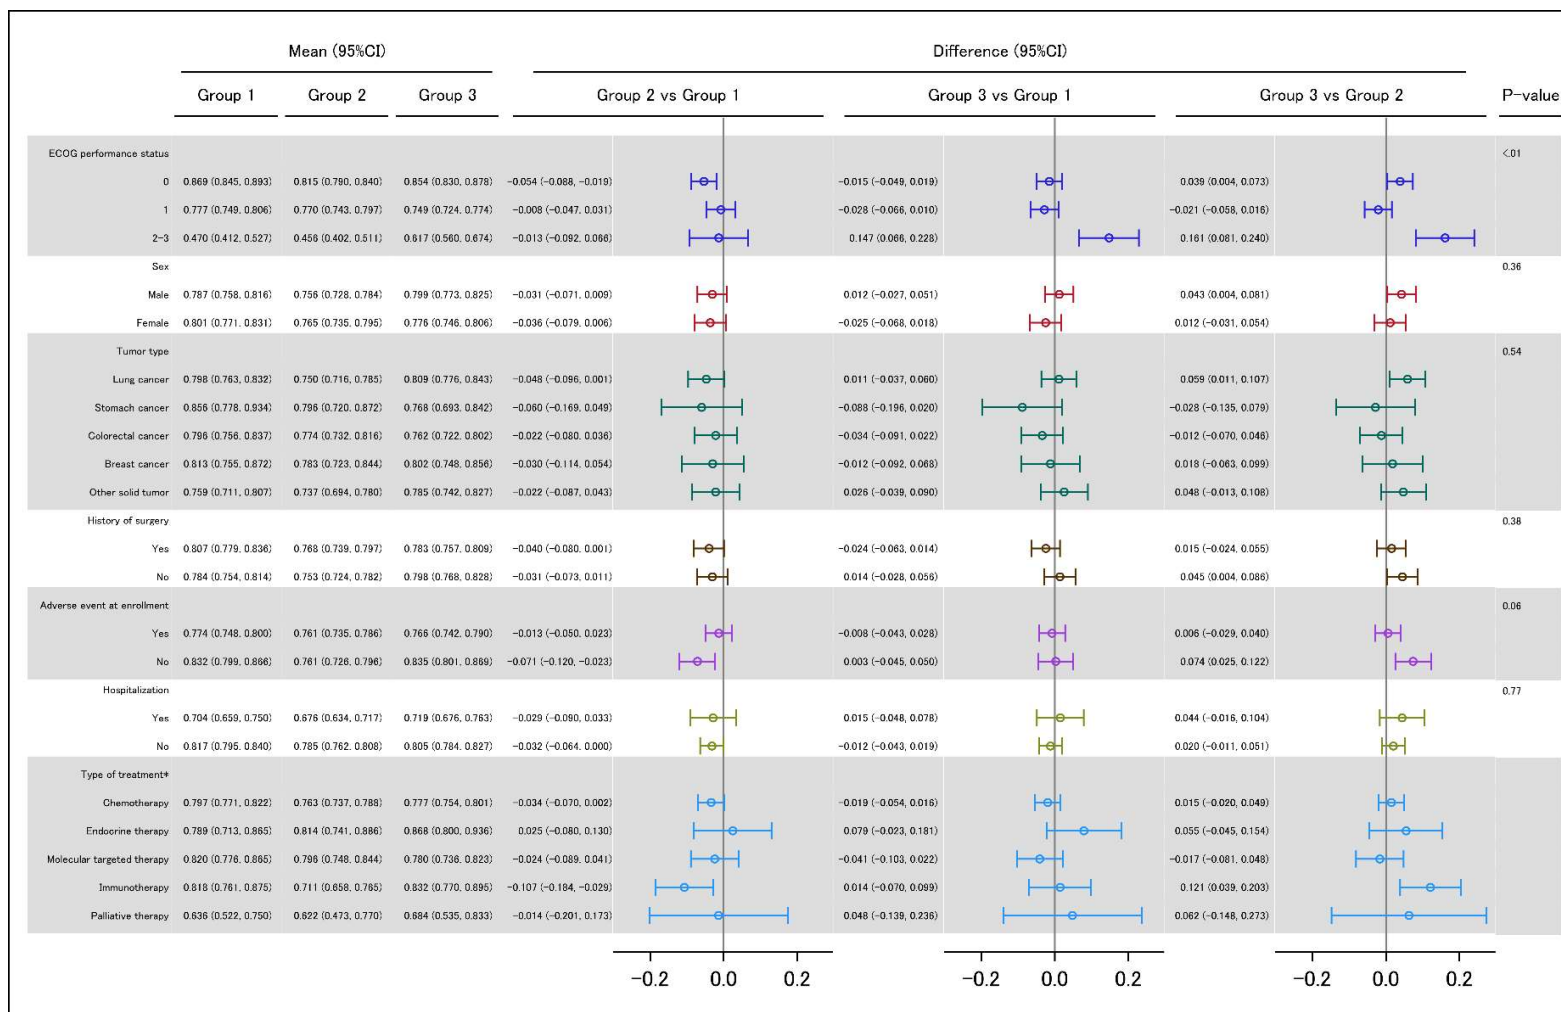

**Fig. S1** Forest plot for the subgroup analysis of the mean EQ-5D-5L index based on the value set for Japan. Groups 1, 2, and 3 consisted of the two questionnaire types that had the EQ-5D-5L in the first, second, and last places, respectively. CI, confidence interval; ECOG, Eastern Cooperative Oncology Group.

\*Multiple choices were allowed; thus, the p-value for the interaction term was not calculated.

Table S5. Mean EQ-5D-5L indexes in Group 1, FEQ and QEF.

|                    | Mean (95% CI)        | Difference (95% CI; P-value)   |                               |
|--------------------|----------------------|--------------------------------|-------------------------------|
|                    |                      | vs Group 1                     | vs FEQ                        |
| Japanese value set |                      |                                |                               |
| Group 1            | 0.796 (0.776, 0.817) | –                              | –                             |
| FEQ                | 0.770 (0.741, 0.799) | –0.026 (–0.062, 0.009; 0.146)  | –                             |
| QEF                | 0.751 (0.722, 0.779) | –0.046 (–0.081, –0.01; 0.011)  | –0.019 (–0.060, 0.022; 0.352) |
| England value set  |                      |                                |                               |
| Group 1            | 0.821 (0.798, 0.844) | –                              | –                             |
| FEQ                | 0.805 (0.772, 0.837) | –0.016 (–0.056, 0.024; 0.427)  | –                             |
| QEF                | 0.777 (0.745, 0.809) | –0.044 (–0.084, –0.004; 0.031) | –0.028 (–0.074, 0.018; 0.238) |
| US value set       |                      |                                |                               |
| Group 1            | 0.784 (0.754, 0.813) | –                              | –                             |
| FEQ                | 0.761 (0.720, 0.802) | –0.022 (–0.073, 0.028; 0.385)  | –                             |
| QEF                | 0.727 (0.687, 0.768) | –0.056 (–0.106, –0.006; 0.028) | –0.034 (–0.092, 0.024; 0.254) |

Group 1 contained the two questionnaire types that had the EQ-5D-5L in the first position.

FEQ and QEF indicate the questionnaire types containing the HRQOL instruments in the order of FACT-G > EQ-5D-5L > EORTC QLQ-C30 and EORTC QLQ-C30 > EQ-5D-5L > FACT-G, respectively.

CI, confidence interval; US, the United States.

Table S6. Rank correlation between the EORTC QLQ-C30 and the FACT-G subscales and the EQ-5D-5L index based on the Japanese value set.

|                          | EORTC QLQ-C30 analysis |       |                      | FACT-G analysis |      |                      |
|--------------------------|------------------------|-------|----------------------|-----------------|------|----------------------|
|                          | EQF                    | QEF   | Difference (P-value) | EFQ             | FEQ  | Difference (P-value) |
| EORTC QLQ-C30            |                        |       |                      |                 |      |                      |
| Physical functioning     | 0.75                   | 0.71  | 0.04 (0.437)         | –               | –    | –                    |
| Role functioning         | 0.79                   | 0.69  | 0.11 (0.042)         | –               | –    | –                    |
| Emotional functioning    | 0.41                   | 0.39  | 0.02 (0.844)         | –               | –    | –                    |
| Cognitive functioning    | 0.41                   | 0.48  | –0.07 (0.433)        | –               | –    | –                    |
| Social functioning       | 0.55                   | 0.55  | –0.01 (0.927)        | –               | –    | –                    |
| Global health status     | 0.66                   | 0.57  | 0.09 (0.215)         | –               | –    | –                    |
| Fatigue                  | –0.71                  | –0.66 | –0.06 (0.351)        | –               | –    | –                    |
| Nausea and vomiting      | –0.27                  | –0.32 | 0.05 (0.638)         | –               | –    | –                    |
| Pain                     | –0.63                  | –0.57 | –0.07 (0.376)        | –               | –    | –                    |
| Dyspnea                  | –0.44                  | –0.46 | 0.02 (0.844)         | –               | –    | –                    |
| Insomnia                 | –0.44                  | –0.34 | –0.10 (0.299)        | –               | –    | –                    |
| Appetite loss            | –0.42                  | –0.4  | –0.02 (0.853)        | –               | –    | –                    |
| Constipation             | –0.29                  | –0.23 | –0.05 (0.617)        | –               | –    | –                    |
| Diarrhea                 | –0.12                  | –0.18 | 0.06 (0.599)         | –               | –    | –                    |
| Financial difficulties   | –0.38                  | –0.33 | –0.05 (0.616)        | –               | –    | –                    |
| FACT-G                   |                        |       |                      |                 |      |                      |
| Physical well-being      | –                      | –     | –                    | 0.73            | 0.69 | 0.04 (0.525)         |
| Social/family well-being | –                      | –     | –                    | 0.09            | 0.07 | 0.02 (0.861)         |

|                       |   |   |   |      |      |              |
|-----------------------|---|---|---|------|------|--------------|
| Emotional well-being  | – | – | – | 0.55 | 0.47 | 0.08 (0.364) |
| Functional well-being | – | – | – | 0.61 | 0.55 | 0.07 (0.397) |

EQF, QEF, EFQ, and FEQ stand for the questionnaire type containing the HRQOL instruments in the order of EQ-5D-5L > EORTC QLQ-C30 > FACT-G, EORTC QLQ-C30 > EQ-5D-5L > FACT-G, EQ-5D-5L > FACT-G > EORTC QLQ-C30, and FACT-G > EQ-5D-5L > EORTC QLQ-C30, respectively.

EORTC QLQ-C30, European Organization for Research and Treatment of Cancer Quality of Life Questionnaire Core 30; FACT-G, Functional Assessment of Cancer Therapy General.

Table S7. Rank correlation between the EORTC QLQ-C30 and the FACT-G subscales and the mobility question in the EQ-5D-5L.

|                          | EORTC QLQ-C30 analysis |       |                      | FACT-G analysis |       |                      |
|--------------------------|------------------------|-------|----------------------|-----------------|-------|----------------------|
|                          | EQF                    | QEF   | Difference (P-value) | EFQ             | FEQ   | Difference (P-value) |
| EORTC QLQ-C30            |                        |       |                      |                 |       |                      |
| Physical functioning     | -0.69                  | -0.68 | 0.00 (0.938)         | -               | -     | -                    |
| Role functioning         | -0.67                  | -0.56 | -0.11 (0.113)        | -               | -     | -                    |
| Emotional functioning    | -0.19                  | -0.16 | -0.02 (0.835)        | -               | -     | -                    |
| Cognitive functioning    | -0.31                  | -0.33 | 0.02 (0.828)         | -               | -     | -                    |
| Social functioning       | -0.43                  | -0.41 | -0.02 (0.871)        | -               | -     | -                    |
| Global health status     | -0.53                  | -0.45 | -0.08 (0.379)        | -               | -     | -                    |
| Fatigue                  | 0.54                   | 0.53  | 0.02 (0.838)         | -               | -     | -                    |
| Nausea and vomiting      | 0.23                   | 0.31  | -0.08 (0.472)        | -               | -     | -                    |
| Pain                     | 0.43                   | 0.37  | 0.06 (0.528)         | -               | -     | -                    |
| Dyspnea                  | 0.39                   | 0.37  | 0.03 (0.776)         | -               | -     | -                    |
| Insomnia                 | 0.32                   | 0.26  | 0.06 (0.570)         | -               | -     | -                    |
| Appetite loss            | 0.31                   | 0.34  | -0.03 (0.804)        | -               | -     | -                    |
| Constipation             | 0.26                   | 0.12  | 0.14 (0.213)         | -               | -     | -                    |
| Diarrhea                 | 0.02                   | 0.22  | -0.20 (0.071)        | -               | -     | -                    |
| Financial difficulties   | 0.25                   | 0.2   | 0.05 (0.629)         | -               | -     | -                    |
| FACT-G                   |                        |       |                      |                 |       |                      |
| Physical well-being      | -                      | -     | -                    | -0.51           | -0.5  | -0.01 (0.890)        |
| Social/family well-being | -                      | -     | -                    | -0.08           | -0.17 | 0.09 (0.462)         |
| Emotional well-being     | -                      | -     | -                    | -0.23           | -0.14 | -0.08 (0.467)        |

|                       |   |   |   |      |       |              |
|-----------------------|---|---|---|------|-------|--------------|
| Functional well-being | – | – | – | –0.4 | –0.43 | 0.03 (0.782) |
|-----------------------|---|---|---|------|-------|--------------|

EQF, QEF, EFQ, and FEQ indicate the questionnaire types containing the HRQOL instruments in the order of EQ-5D-5L > EORTC QLQ-C30 > FACT-G, EORTC QLQ-C30 > EQ-5D-5L > FACT-G, EQ-5D-5L > FACT-G > EORTC QLQ-C30, and FACT-G > EQ-5D-5L > EORTC QLQ-C30, respectively.

EORTC QLQ-C30, European Organization for Research and Treatment of Cancer Quality of Life Questionnaire Core 30; FACT-G, Functional Assessment of Cancer Therapy General.

Table S8. Rank correlation between the EORTC QLQ-C30 and the FACT-G subscales and the self-care question in the EQ-5D-5L.

|                          | EORTC QLQ-C30 analysis |       |                      | FACT-G analysis |       |                      |
|--------------------------|------------------------|-------|----------------------|-----------------|-------|----------------------|
|                          | EQF                    | QEF   | Difference (P-value) | EFQ             | FEQ   | Difference (P-value) |
| <b>EORTC QLQ-C30</b>     |                        |       |                      |                 |       |                      |
| Physical functioning     | -0.59                  | -0.37 | -0.22 (0.012)        | -               | -     | -                    |
| Role functioning         | -0.51                  | -0.44 | -0.08 (0.397)        | -               | -     | -                    |
| Emotional functioning    | -0.19                  | -0.17 | -0.02 (0.835)        | -               | -     | -                    |
| Cognitive functioning    | -0.26                  | -0.34 | 0.08 (0.457)         | -               | -     | -                    |
| Social functioning       | -0.35                  | -0.37 | 0.02 (0.842)         | -               | -     | -                    |
| Global health status     | -0.47                  | -0.33 | -0.14 (0.143)        | -               | -     | -                    |
| Fatigue                  | 0.43                   | 0.31  | 0.13 (0.195)         | -               | -     | -                    |
| Nausea and vomiting      | 0.11                   | 0.21  | -0.11 (0.341)        | -               | -     | -                    |
| Pain                     | 0.36                   | 0.35  | 0.01 (0.892)         | -               | -     | -                    |
| Dyspnea                  | 0.27                   | 0.19  | 0.08 (0.477)         | -               | -     | -                    |
| Insomnia                 | 0.27                   | 0.3   | -0.03 (0.811)        | -               | -     | -                    |
| Appetite loss            | 0.19                   | 0.25  | -0.06 (0.590)        | -               | -     | -                    |
| Constipation             | 0.22                   | 0.15  | 0.08 (0.487)         | -               | -     | -                    |
| Diarrhea                 | -0.02                  | 0.14  | -0.16 (0.153)        | -               | -     | -                    |
| Financial difficulties   | 0.27                   | 0.16  | 0.12 (0.285)         | -               | -     | -                    |
| <b>FACT-G</b>            |                        |       |                      |                 |       |                      |
| Physical well-being      | -                      | -     | -                    | -0.38           | -0.38 | -0.01 (0.955)        |
| Social/family well-being | -                      | -     | -                    | -0.06           | -0.11 | 0.04 (0.711)         |
| Emotional well-being     | -                      | -     | -                    | -0.25           | -0.18 | -0.08 (0.505)        |



|                       |   |   |   |       |       |              |
|-----------------------|---|---|---|-------|-------|--------------|
| Functional well-being | – | – | – | –0.35 | –0.37 | 0.02 (0.843) |
|-----------------------|---|---|---|-------|-------|--------------|

EQF, QEF, EFQ, and FEQ indicate the questionnaire types containing the HRQOL instruments in the order of EQ-5D-5L > EORTC QLQ-C30 > FACT-G, EORTC QLQ-C30 > EQ-5D-5L > FACT-G, EQ-5D-5L > FACT-G > EORTC QLQ-C30, and FACT-G > EQ-5D-5L > EORTC QLQ-C30, respectively.

EORTC QLQ-C30, European Organization for Research and Treatment of Cancer Quality of Life Questionnaire Core 30; FACT-G, Functional Assessment of Cancer Therapy General.

Table S9. Rank correlation between the EORTC QLQ-C30 and the FACT-G subscales and the usual activities question in the EQ-5D-5L.

|                          | EORTC QLQ-C30 analysis |       |                      | FACT-G analysis |       |                      |
|--------------------------|------------------------|-------|----------------------|-----------------|-------|----------------------|
|                          | EQF                    | QEF   | Difference (P-value) | EFQ             | FEQ   | Difference (P-value) |
| <b>EORTC QLQ-C30</b>     |                        |       |                      |                 |       |                      |
| Physical functioning     | -0.75                  | -0.66 | -0.09 (0.110)        | -               | -     | -                    |
| Role functioning         | -0.84                  | -0.74 | -0.10 (0.015)        | -               | -     | -                    |
| Emotional functioning    | -0.29                  | -0.33 | 0.04 (0.681)         | -               | -     | -                    |
| Cognitive functioning    | -0.41                  | -0.41 | 0.00 (1.000)         | -               | -     | -                    |
| Social functioning       | -0.53                  | -0.52 | -0.01 (0.868)        | -               | -     | -                    |
| Global health status     | -0.65                  | -0.51 | -0.14 (0.058)        | -               | -     | -                    |
| Fatigue                  | 0.68                   | 0.64  | 0.04 (0.529)         | -               | -     | -                    |
| Nausea and vomiting      | 0.28                   | 0.3   | -0.02 (0.859)        | -               | -     | -                    |
| Pain                     | 0.55                   | 0.44  | 0.11 (0.189)         | -               | -     | -                    |
| Dyspnea                  | 0.4                    | 0.48  | -0.07 (0.441)        | -               | -     | -                    |
| Insomnia                 | 0.38                   | 0.23  | 0.15 (0.162)         | -               | -     | -                    |
| Appetite loss            | 0.38                   | 0.36  | 0.02 (0.821)         | -               | -     | -                    |
| Constipation             | 0.25                   | 0.19  | 0.06 (0.594)         | -               | -     | -                    |
| Diarrhea                 | 0.12                   | 0.12  | 0.00 (1.000)         | -               | -     | -                    |
| Financial difficulties   | 0.43                   | 0.33  | 0.09 (0.353)         | -               | -     | -                    |
| <b>FACT-G</b>            |                        |       |                      |                 |       |                      |
| Physical well-being      | -                      | -     | -                    | -0.68           | -0.6  | -0.08 (0.280)        |
| Social/family well-being | -                      | -     | -                    | 0.04            | -0.02 | 0.05 (0.667)         |

|                       |   |   |   |       |       |               |
|-----------------------|---|---|---|-------|-------|---------------|
| Emotional well-being  | – | – | – | –0.4  | –0.32 | –0.08 (0.446) |
| Functional well-being | – | – | – | –0.51 | –0.55 | 0.04 (0.665)  |

EQF, QEF, EFQ, and FEQ denote the questionnaire types containing the HRQOL instruments in the order of EQ-5D-5L > EORTC QLQ-C30 > FACT-G, EORTC QLQ-C30 > EQ-5D-5L > FACT-G, EQ-5D-5L > FACT-G > EORTC QLQ-C30, and FACT-G > EQ-5D-5L > EORTC QLQ-C30, respectively.

EORTC QLQ-C30, European Organization for Research and Treatment of Cancer Quality of Life Questionnaire Core 30; FACT-G, Functional Assessment of Cancer Therapy General.

Table S10. Rank correlation between the EORTC QLQ-C30 and the FACT-G subscales and the pain/discomfort question in the EQ-5D-5L.

|                          | EORTC QLQ-C30 analysis |       |                      | FACT-G analysis |       |                      |
|--------------------------|------------------------|-------|----------------------|-----------------|-------|----------------------|
|                          | EQF                    | QEF   | Difference (P-value) | EFQ             | FEQ   | Difference (P-value) |
| <b>EORTC QLQ-C30</b>     |                        |       |                      |                 |       |                      |
| Physical functioning     | -0.49                  | -0.37 | -0.11 (0.228)        | -               | -     | -                    |
| Role functioning         | -0.51                  | -0.41 | -0.10 (0.272)        | -               | -     | -                    |
| Emotional functioning    | -0.37                  | -0.29 | -0.08 (0.429)        | -               | -     | -                    |
| Cognitive functioning    | -0.36                  | -0.37 | 0.02 (0.864)         | -               | -     | -                    |
| Social functioning       | -0.4                   | -0.29 | -0.11 (0.297)        | -               | -     | -                    |
| Global health status     | -0.52                  | -0.46 | -0.06 (0.493)        | -               | -     | -                    |
| Fatigue                  | 0.61                   | 0.43  | 0.19 (0.027)         | -               | -     | -                    |
| Nausea and vomiting      | 0.22                   | 0.19  | 0.03 (0.766)         | -               | -     | -                    |
| Pain                     | 0.74                   | 0.71  | 0.04 (0.487)         | -               | -     | -                    |
| Dyspnea                  | 0.39                   | 0.36  | 0.03 (0.800)         | -               | -     | -                    |
| Insomnia                 | 0.5                    | 0.29  | 0.21 (0.031)         | -               | -     | -                    |
| Appetite loss            | 0.47                   | 0.37  | 0.11 (0.269)         | -               | -     | -                    |
| Constipation             | 0.19                   | 0.25  | -0.05 (0.627)        | -               | -     | -                    |
| Diarrhea                 | 0.1                    | 0.11  | -0.01 (0.925)        | -               | -     | -                    |
| Financial difficulties   | 0.28                   | 0.26  | 0.02 (0.825)         | -               | -     | -                    |
| <b>FACT-G</b>            |                        |       |                      |                 |       |                      |
| Physical well-being      | -                      | -     | -                    | -0.67           | -0.58 | -0.09 (0.196)        |
| Social/family well-being | -                      | -     | -                    | 0               | -0.12 | 0.12 (0.302)         |

|                       |   |   |   |       |       |               |
|-----------------------|---|---|---|-------|-------|---------------|
| Emotional well-being  | – | – | – | –0.45 | –0.37 | –0.08 (0.427) |
| Functional well-being | – | – | – | –0.46 | –0.37 | –0.09 (0.350) |

EQF, QEF, EFQ, and FEQ indicate the questionnaire types containing the HRQOL instruments in the order of EQ-5D-5L > EORTC QLQ-C30 > FACT-G, EORTC QLQ-C30 > EQ-5D-5L > FACT-G, EQ-5D-5L > FACT-G > EORTC QLQ-C30, and FACT-G > EQ-5D-5L > EORTC QLQ-C30.

EORTC QLQ-C30, European Organization for Research and Treatment of Cancer Quality of Life Questionnaire Core 30; FACT-G, Functional Assessment of Cancer Therapy General.

Table S11. Rank correlation between the EORTC QLQ-C30 and the FACT-G subscales and the anxiety/depression question in the EQ-5D-5L.

|                          | EORTC QLQ-C30 analysis |       |                      | FACT-G analysis |       |                      |
|--------------------------|------------------------|-------|----------------------|-----------------|-------|----------------------|
|                          | EQF                    | QEF   | Difference (P-value) | EFQ             | FEQ   | Difference (P-value) |
| <b>EORTC QLQ-C30</b>     |                        |       |                      |                 |       |                      |
| Physical functioning     | -0.26                  | -0.26 | 0.00 (0.994)         | -               | -     | -                    |
| Role functioning         | -0.28                  | -0.22 | -0.07 (0.544)        | -               | -     | -                    |
| Emotional functioning    | -0.52                  | -0.45 | -0.07 (0.419)        | -               | -     | -                    |
| Cognitive functioning    | -0.23                  | -0.32 | 0.09 (0.397)         | -               | -     | -                    |
| Social functioning       | -0.33                  | -0.33 | 0.00 (0.982)         | -               | -     | -                    |
| Global health status     | -0.34                  | -0.28 | -0.07 (0.530)        | -               | -     | -                    |
| Fatigue                  | 0.3                    | 0.34  | -0.04 (0.664)        | -               | -     | -                    |
| Nausea and vomiting      | 0.14                   | 0.23  | -0.09 (0.423)        | -               | -     | -                    |
| Pain                     | 0.29                   | 0.26  | 0.02 (0.831)         | -               | -     | -                    |
| Dyspnea                  | 0.2                    | 0.23  | -0.03 (0.782)        | -               | -     | -                    |
| Insomnia                 | 0.27                   | 0.19  | 0.08 (0.476)         | -               | -     | -                    |
| Appetite loss            | 0.2                    | 0.22  | -0.02 (0.892)        | -               | -     | -                    |
| Constipation             | 0.26                   | 0.23  | 0.03 (0.778)         | -               | -     | -                    |
| Diarrhea                 | 0.08                   | 0.05  | 0.03 (0.796)         | -               | -     | -                    |
| Financial difficulties   | 0.21                   | 0.28  | -0.08 (0.487)        | -               | -     | -                    |
| <b>FACT-G</b>            |                        |       |                      |                 |       |                      |
| Physical well-being      | -                      | -     | -                    | -0.52           | -0.48 | -0.04 (0.643)        |
| Social/family well-being | -                      | -     | -                    | -0.15           | 0.01  | -0.16 (0.175)        |

|                       |   |   |   |       |       |               |
|-----------------------|---|---|---|-------|-------|---------------|
| Emotional well-being  | – | – | – | –0.68 | –0.63 | –0.05 (0.499) |
| Functional well-being | – | – | – | –0.51 | –0.31 | –0.20 (0.044) |

EQF, QEF, EFQ, and FEQ denote the questionnaire types containing the HRQOL instruments in the order of EQ-5D-5L > EORTC QLQ-C30 > FACT-G, EORTC QLQ-C30 > EQ-5D-5L > FACT-G, EQ-5D-5L > FACT-G > EORTC QLQ-C30, and FACT-G > EQ-5D-5L > EORTC QLQ-C30, respectively.

EORTC QLQ-C30, European Organization for Research and Treatment of Cancer Quality of Life Questionnaire Core 30; FACT-G, Functional Assessment of Cancer Therapy General.

Table S12. Covariate-adjusted least square mean differences in proportions of the incomplete EQ-5D-5L among the three groups.

|                                     | Difference (95% CI; P-value) |                             |
|-------------------------------------|------------------------------|-----------------------------|
|                                     | vs Group 1                   | vs Group 2                  |
| Incomplete EQ-5D-5L for any reasons |                              |                             |
| Group 1                             | –                            | –                           |
| Group 2                             | 0.00 (–0.04, 0.05; 0.922)    | –                           |
| Group 3                             | –0.05 (–0.09, –0.02; 0.007)  | –0.06 (–0.10, –0.02; 0.006) |

Groups 1, 2, and 3 contained the two questionnaire types that had the EQ-5D-5L in the first, second, and last places, respectively. CI, confidence interval.



Table S13. Proportions of the FACT-G with missing subscales in the three groups.

|                                                                                                                    | Proportion (95% CI) | Difference (95% CI; P-value) |                             |
|--------------------------------------------------------------------------------------------------------------------|---------------------|------------------------------|-----------------------------|
|                                                                                                                    |                     | vs Group 1                   | vs Group 2                  |
| FACT-G with any of the four subscales or its total score missing for any reasons                                   |                     |                              |                             |
| Group 1                                                                                                            | 0.12 (0.09, 0.16)   | –                            | –                           |
| Group 2                                                                                                            | 0.11 (0.07, 0.14)   | –0.02 (–0.07, 0.03; 0.487)   | –                           |
| Group 3                                                                                                            | 0.06 (0.03, 0.08)   | –0.07 (–0.11, –0.02; 0.002)  | –0.05 (–0.09, –0.01; 0.016) |
| Did not return to the data center                                                                                  |                     |                              |                             |
| Group 1                                                                                                            | 0.05 (0.03, 0.08)   | –                            | –                           |
| Group 2                                                                                                            | 0.06 (0.04, 0.09)   | 0.01 (–0.03, 0.04; 0.668)    | –                           |
| Group 3                                                                                                            | 0.02 (0.01, 0.04)   | –0.03 (–0.06, 0.00; 0.038)   | –0.04 (–0.07, –0.01; 0.012) |
| Returned the questionnaire without any response                                                                    |                     |                              |                             |
| Group 1                                                                                                            | 0.02 (0.00, 0.03)   | –                            | –                           |
| Group 2                                                                                                            | 0.02 (0.01, 0.04)   | 0.01 (–0.02, 0.03; 0.616)    | –                           |
| Group 3                                                                                                            | 0.01 (0.00, 0.03)   | 0.00 (–0.02, 0.02; 0.721)    | –0.01 (–0.03, 0.01; 0.390)  |
| FACT-G with any of the four subscales or its total score missing with some responses to the returned questionnaire |                     |                              |                             |
| Group 1                                                                                                            | 0.05 (0.03, 0.08)   | –                            | –                           |
| Group 2                                                                                                            | 0.02 (0.01, 0.04)   | –0.03 (–0.06, 0.00; 0.040)   | –                           |
| Group 3                                                                                                            | 0.02 (0.01, 0.03)   | –0.03 (–0.06, –0.01; 0.021)  | 0.00 (–0.02, 0.02; 0.777)   |

Groups 1, 2, and 3 contained the two questionnaire types that had the EQ-5D-5L in the first, second, and last places, respectively. CI, confidence interval; FACT-G, Functional Assessment of Cancer Therapy General.

Table S14. Proportions of the EORTC QLQ-C30 with missing subscale in the three groups.

|                                                                                                           | Proportion (95% CI) | Difference (95% CI; P-value) |                             |
|-----------------------------------------------------------------------------------------------------------|---------------------|------------------------------|-----------------------------|
|                                                                                                           |                     | vs Group 1                   | vs Group 2                  |
| EORTC QLQ-C30 with any of the fifteen subscales missing for any reasons                                   |                     |                              |                             |
| Group 1                                                                                                   | 0.13 (0.09, 0.16)   | –                            | –                           |
| Group 2                                                                                                   | 0.13 (0.09, 0.16)   | 0.00 (–0.05, 0.05; 0.919)    | –                           |
| Group 3                                                                                                   | 0.06 (0.03, 0.08)   | –0.07 (–0.11, –0.03; 0.001)  | –0.07 (–0.11, –0.02; 0.002) |
| Did not return to the data center                                                                         |                     |                              |                             |
| Group 1                                                                                                   | 0.05 (0.03, 0.08)   | –                            | –                           |
| Group 2                                                                                                   | 0.06 (0.04, 0.09)   | 0.01 (–0.03, 0.04; 0.668)    | –                           |
| Group 3                                                                                                   | 0.02 (0.01, 0.04)   | –0.03 (–0.06, 0.00; 0.038)   | –0.04 (–0.07, –0.01; 0.012) |
| Returned the questionnaire without any response                                                           |                     |                              |                             |
| Group 1                                                                                                   | 0.02 (0.00, 0.03)   | –                            | –                           |
| Group 2                                                                                                   | 0.02 (0.01, 0.04)   | 0.01 (–0.02, 0.03; 0.616)    | –                           |
| Group 3                                                                                                   | 0.01 (0.00, 0.03)   | 0.00 (–0.02, 0.02; 0.721)    | –0.01 (–0.03, 0.01; 0.390)  |
| EORTC QLQ-C30 with any of the fifteen subscales missing with some responses to the returned questionnaire |                     |                              |                             |
| Group 1                                                                                                   | 0.06 (0.03, 0.08)   | –                            | –                           |
| Group 2                                                                                                   | 0.04 (0.02, 0.06)   | –0.02 (–0.05, 0.02; 0.341)   | –                           |
| Group 3                                                                                                   | 0.02 (0.01, 0.03)   | –0.04 (–0.06, –0.01; 0.013)  | –0.02 (–0.05, 0.00; 0.115)  |

Groups 1, 2, and 3 contained the two questionnaire types that had the EQ-5D-5L in the first, second, and last places, respectively.  
 CI, confidence interval.
